# Supplementary material for: The Association of Physical Activity with Glaucoma and Related Traits in the UK Biobank
Source: PubMed Central journal article supplement (PMC10913205; doi:10.1016/j.ophtha.2023.06.009), 2023-06-17

# The association of physical activity with glaucoma and related traits in the UK Biobank

## APPENDIX 2: MENDELIAN RANDOMIZATION ANALYSES

### *Study design*

We conducted two-sample Mendelian randomization (MR) analyses to test for a causal association between two genetically-determined physical activity phenotypes and five glaucoma-related outcomes. MR is a technique which uses genetic variants as instrumental variables (IVs) to estimate the causal effect of an exposure on an outcome.<sup>1</sup> By leveraging the random allocation of alleles at conception, MR allows for estimates which are unbiased by residual confounding and reverse causation. Three assumptions need to be satisfied to ensure a valid IV: (1) the IV must be associated with the exposure; (2) the IV must not be associated with any confounder of the exposure-outcome relationship; and (3) the IV must affect the outcome only through the exposure of interest. If these assumptions are satisfied, an estimated casual effect can be calculated from the observed IV-exposure and IV-outcome associations.

### *Instrumental variable selection*

We used published data from a recent large genome-wide association study (GWAS) meta-analysis (including the UK Biobank) of physical activity to guide construction of our instrumental variables.<sup>2</sup> The study identified 89 and 11 independent genetic variants associated (at  $P < 5 \times 10^{-9}$ ) with ‘leisure screen time’ (LST) and ‘moderate-to-vigorous physical activity’ (MVPA), respectively. We included only significant single nucleotide polymorphisms (SNPs) from the primary meta-analyses of European ancestry participants ( $n$  up to 606,820 for LST and  $n$  up to 526,725 for MVPA). Genetic principal components, population stratification and participant relatedness were adjusted for in the original study. At loci with multiple genome-wide significant SNPs, we excluded those with linkage disequilibrium  $R^2 > 0.001$  and within 10,000 kb, retaining only the SNP with the lowest  $P$ -value, using the 1000 Genomes Project European reference population.<sup>3</sup> Palindromic SNPs with minor allele frequency  $> 0.42$ , or when allele frequencies were not reported, were excluded. Effect alleles were harmonized across exposure and outcome datasets. Full details of these SNPs and their associations with glaucoma and related traits are available in **Supplementary Table 1**.

### *Outcome data sources*

We utilized publicly-available summary statistics from large GWAS and GWAS meta-analyses for five glaucoma-related outcomes in participants of European ancestry. These included intraocular pressure

(IOP) ( $n=139,555$ ),<sup>4</sup> macular retinal nerve fiber layer thickness (mRNFL) ( $n=31,434$ ),<sup>5</sup> macular ganglion cell-inner plexiform layer thickness (mGCIPL) ( $n=31,434$ ),<sup>5</sup> vertical cup-disc ratio (vCDR) ( $n=111,724$ ),<sup>6</sup> and primary open-angle glaucoma (POAG) ( $n=216,257$ ).<sup>7</sup> All outcome data sources included UK Biobank participants in their analyses.

### ***Statistical analyses***

The main MR analyses were performed using a multiplicative random-effects inverse-variance weighted (IVW) method.<sup>9</sup> This method provides precise and efficient estimates but is sensitive to invalid IVs and pleiotropy.<sup>10</sup> We therefore conducted sensitivity analyses using three alternative MR methods: weighted median,<sup>11</sup> MR-Egger<sup>12</sup> and MR pleiotropy residual sum and outlier (MR-PRESSO).<sup>13</sup> Each method makes different assumptions about the nature of pleiotropy and consistent estimates across methods strengthens causal inferences.<sup>14</sup> The weighted median method gives consistent estimates if the majority of IVs are valid, while the weighted mode method assumes that a plurality of IVs are valid. The MR-Egger and MR-PRESSO methods can test and correct for directional pleiotropy.

We assessed for heterogeneity with the  $I^2$  and Cochran's  $Q$  statistics in the IVW model and with Rucker's  $Q'$  statistic in MR-Egger regression. The  $I^2_{GX}$  statistic is an indicator of expected relative bias (or dilution) of the MR-Egger causal estimate.<sup>15</sup> In MR-Egger regression, a significant difference of the intercept from zero is evidence for average directional horizontal pleiotropy.<sup>12</sup> The MR-PRESSO global test evaluates for horizontal pleiotropy, the outlier test detects specific SNP outliers, and the distortion test evaluates whether there is a significant difference in the causal estimate before and after adjusting for outliers.<sup>13</sup> Full results of these tests and statistics are available in **Supplementary Table 3**.

MR estimates are presented as unit change in the outcome per one standard deviation increase in the genetic instrument. We applied a conservative Bonferroni-corrected significance threshold of  $P < 0.005$  ( $P < 0.05/10$ , to account for tests between two exposures and five outcomes). All analyses were performed in R version 4.1.1 (<https://www.R-project.org>) using the *MendelianRandomization* and *MRPRESSO* packages.

## References

1. Davies NM, Holmes M V, Davey Smith G. Reading Mendelian randomisation studies: a guide, glossary, and checklist for clinicians. *BMJ*. 2018;362:k601.
2. Wang Z, Emmerich A, Pillon NJ, Moore T, Hemerich D, Cornelis MC, et al. Genome-wide association analyses of physical activity and sedentary behavior provide insights into underlying mechanisms and roles in disease prevention. *Nat Genet*. 2022;54(9):1332–44.
3. Auton A, Abecasis GR, Altshuler DM, Durbin RM, Abecasis GR, Bentley DR, et al. A global reference for human genetic variation. *Nature*. 2015;526(7571):68–74.
4. Khawaja AP, Cooke Bailey JN, Wareham NJ, Scott RA, Simcoe M, Igo RP, et al. Genome-wide analyses identify 68 new loci associated with intraocular pressure and improve risk prediction for primary open-angle glaucoma. *Nat Genet*. 2018;50(6):778–82.
5. Currant H, Hysi P, Fitzgerald TW, Gharahkhani P, Bonnemaier PWM, Senabouth A, et al. Genetic variation affects morphological retinal phenotypes extracted from UK Biobank optical coherence tomography images. *PLoS Genet*. 2021;17(5):e1009497.
6. Han X, Steven K, Qassim A, Marshall HN, Bean C, Tremeer M, et al. Automated AI labeling of optic nerve head enables insights into cross-ancestry glaucoma risk and genetic discovery in >280,000 images from UKB and CLSA. *Am J Hum Genet*. 2021;108(7):1204–16.
7. Gharahkhani P, Jorgenson E, Hysi P, Khawaja AP, Pendergrass S, Han X, et al. Genome-wide meta-analysis identifies 127 open-angle glaucoma loci with consistent effect across ancestries. *Nat Commun*. 2021;12(1):1258.
8. Burgess S, Davies NM, Thompson SG. Bias due to participant overlap in two-sample Mendelian randomization. *Genet Epidemiol*. 2016;40(7):597–608.
9. Burgess S, Butterworth A, Thompson SG. Mendelian Randomization Analysis With Multiple Genetic Variants Using Summarized Data. *Genet Epidemiol*. 2013;37(7):658–65.
10. Burgess S, Bowden J, Fall T, Ingelsson E, Thompson SG. Sensitivity Analyses for Robust Causal Inference from Mendelian Randomization Analyses with Multiple Genetic Variants. *Epidemiology*. 2017;28(1):30–42.
11. Bowden J, Davey Smith G, Haycock PC, Burgess S. Consistent Estimation in Mendelian Randomization with Some Invalid Instruments Using a Weighted Median Estimator. *Genet Epidemiol*. 2016;40(4):304–14.
12. Bowden J, Davey Smith G, Burgess S. Mendelian randomization with invalid instruments: effect estimation and bias detection through Egger regression. *Int J Epidemiol*. 2015;44(2):512–25.
13. Verbanck M, Chen C-Y, Neale B, Do R. Detection of widespread horizontal pleiotropy in causal relationships inferred from Mendelian randomization between complex traits and diseases. *Nat Genet*. 2018;50(5):693–8.
14. Lawlor DA, Tilling K, Davey Smith G. Triangulation in aetiological epidemiology. *Int J Epidemiol*. 2016;45(6):1866–86.
15. Bowden J, Del Greco M F, Minelli C, Davey Smith G, Sheehan NA, Thompson JR. Assessing the suitability of summary data for two-sample Mendelian randomization analyses using MR-Egger regression: the role of the I<sup>2</sup> statistic. *Int J Epidemiol*. 2016;45(6):1961–74.

**Supplementary Table 1.** Details of SNPs included in the physical activity instrumental variables and their association with glaucoma and related traits

| SNP         | Chr | BP        | RA | EA | EAF  | LST    |       | IOP    |       | mRNFL  |       | mGCIPL |       | vCDR   |       | POAG   |       |
|-------------|-----|-----------|----|----|------|--------|-------|--------|-------|--------|-------|--------|-------|--------|-------|--------|-------|
|             |     |           |    |    |      | Beta   | SE    | Beta   | SE    | Beta   | SE    | Beta   | SE    | Beta   | SE    | Beta   | SE    |
| rs3791033   | 1   | 44134077  | T  | C  | 0.33 | -0.033 | 0.004 | 0.066  | 0.014 | -0.024 | 0.038 | 0.010  | 0.050 | 0.001  | 0.001 | 0.007  | 0.014 |
| rs10889193  | 1   | 61106174  | A  | C  | 0.45 | -0.024 | 0.004 | –      | –     | 0.074  | 0.037 | 0.046  | 0.048 | -0.001 | 0.001 | -0.037 | 0.022 |
| rs71658797  | 1   | 77967507  | A  | T  | 0.88 | -0.037 | 0.006 | –      | –     | -0.056 | 0.056 | -0.136 | 0.073 | –      | –     | –      | –     |
| rs12062845  | 1   | 98342685  | A  | C  | 0.78 | -0.028 | 0.004 | 0.014  | 0.016 | 0.101  | 0.044 | 0.040  | 0.058 | 0.000  | 0.001 | 0.013  | 0.015 |
| rs197439    | 1   | 112280990 | G  | A  | 0.60 | -0.026 | 0.004 | 0.035  | 0.013 | -0.012 | 0.037 | -0.019 | 0.049 | 0.001  | 0.001 | -0.009 | 0.013 |
| rs6685030   | 1   | 171805284 | G  | A  | 0.48 | -0.022 | 0.004 | -0.002 | 0.013 | 0.053  | 0.036 | -0.013 | 0.048 | 0.000  | 0.000 | -0.026 | 0.013 |
| rs62131183  | 2   | 45102896  | G  | A  | 0.05 | -0.054 | 0.009 | -0.029 | 0.032 | 0.138  | 0.086 | 0.070  | 0.114 | 0.001  | 0.002 | -0.006 | 0.032 |
| rs10189857  | 2   | 60713235  | G  | A  | 0.57 | -0.027 | 0.004 | 0.025  | 0.013 | 0.007  | 0.037 | -0.013 | 0.048 | 0.000  | 0.001 | 0.014  | 0.013 |
| rs4303732   | 2   | 100830040 | T  | C  | 0.40 | -0.027 | 0.004 | -0.021 | 0.013 | 0.027  | 0.037 | 0.110  | 0.048 | 0.000  | 0.000 | -0.025 | 0.013 |
| rs62151809  | 2   | 104433256 | T  | C  | 0.55 | -0.023 | 0.004 | 0.007  | 0.013 | -0.015 | 0.037 | 0.016  | 0.048 | 0.000  | 0.001 | 0.012  | 0.013 |
| rs114590429 | 2   | 166176789 | A  | C  | 0.88 | -0.038 | 0.006 | 0.031  | 0.021 | -0.071 | 0.056 | 0.018  | 0.074 | 0.001  | 0.001 | 0.013  | 0.020 |
| rs12617870  | 2   | 193746283 | T  | G  | 0.46 | -0.026 | 0.004 | 0.012  | 0.013 | 0.001  | 0.037 | 0.026  | 0.048 | 0.000  | 0.001 | -0.008 | 0.013 |
| rs36079846  | 2   | 215367159 | C  | T  | 0.52 | -0.024 | 0.004 | -0.014 | 0.013 | 0.033  | 0.036 | 0.007  | 0.048 | 0.000  | 0.000 | -0.001 | 0.013 |
| rs7615206   | 3   | 49937505  | C  | T  | 0.57 | -0.035 | 0.004 | -0.012 | 0.013 | -0.026 | 0.037 | -0.105 | 0.048 | 0.002  | 0.001 | 0.017  | 0.013 |
| rs76267866  | 3   | 70540347  | T  | A  | 0.79 | -0.030 | 0.005 | –      | –     | -0.095 | 0.045 | 0.005  | 0.059 | –      | –     | –      | –     |
| rs62244886  | 3   | 71587392  | C  | G  | 0.40 | -0.024 | 0.004 | –      | –     | -0.054 | 0.037 | 0.035  | 0.049 | –      | –     | –      | –     |
| rs7430216   | 3   | 75201030  | T  | C  | 0.78 | -0.025 | 0.004 | 0.027  | 0.016 | -0.001 | 0.044 | 0.001  | 0.057 | 0.000  | 0.001 | 0.002  | 0.016 |
| rs1375561   | 3   | 85658230  | T  | C  | 0.35 | -0.023 | 0.004 | 0.024  | 0.014 | 0.041  | 0.038 | 0.037  | 0.050 | 0.000  | 0.000 | 0.009  | 0.014 |
| rs9867121   | 3   | 114631548 | C  | A  | 0.18 | -0.032 | 0.005 | -0.043 | 0.017 | 0.077  | 0.047 | 0.015  | 0.061 | 0.000  | 0.001 | -0.040 | 0.017 |
| rs743699    | 4   | 3305116   | G  | A  | 0.74 | -0.027 | 0.004 | -0.010 | 0.015 | -0.019 | 0.042 | -0.008 | 0.055 | -0.001 | 0.001 | 0.015  | 0.015 |
| rs4416502   | 4   | 77030872  | A  | G  | 0.80 | -0.029 | 0.005 | -0.010 | 0.016 | 0.029  | 0.045 | 0.014  | 0.060 | -0.001 | 0.001 | -0.033 | 0.016 |
| rs13107325  | 4   | 103188709 | T  | C  | 0.93 | -0.040 | 0.007 | 0.043  | 0.025 | 0.063  | 0.070 | -0.020 | 0.091 | 0.003  | 0.001 | 0.025  | 0.026 |
| rs262890    | 5   | 62930015  | G  | A  | 0.70 | -0.034 | 0.004 | 0.009  | 0.014 | 0.009  | 0.040 | 0.047  | 0.052 | 0.000  | 0.000 | 0.026  | 0.014 |
| rs249960    | 5   | 96164771  | A  | G  | 0.18 | -0.030 | 0.005 | -0.005 | 0.017 | -0.029 | 0.047 | -0.134 | 0.062 | 0.001  | 0.001 | 0.010  | 0.017 |
| rs396321    | 5   | 112113735 | C  | T  | 0.51 | -0.021 | 0.004 | 0.016  | 0.013 | 0.032  | 0.036 | -0.020 | 0.048 | 0.003  | 0.001 | 0.028  | 0.013 |
| rs2964252   | 5   | 152067929 | G  | A  | 0.32 | -0.024 | 0.004 | 0.013  | 0.014 | -0.010 | 0.039 | -0.003 | 0.051 | 0.001  | 0.001 | -0.019 | 0.014 |
| rs1947066   | 5   | 161101615 | A  | G  | 0.20 | -0.030 | 0.004 | -0.008 | 0.016 | 0.000  | 0.045 | 0.014  | 0.060 | 0.000  | 0.000 | -0.013 | 0.016 |
| rs558134    | 6   | 12693454  | C  | T  | 0.38 | -0.023 | 0.004 | 0.021  | 0.013 | 0.024  | 0.037 | 0.046  | 0.049 | -0.001 | 0.001 | 0.012  | 0.013 |
| rs6457816   | 6   | 35362848  | C  | T  | 0.93 | -0.041 | 0.007 | 0.038  | 0.026 | -0.062 | 0.073 | -0.124 | 0.096 | 0.001  | 0.001 | 0.048  | 0.026 |
| rs78394231  | 6   | 107649123 | C  | T  | 0.90 | -0.038 | 0.007 | -0.009 | 0.022 | -0.029 | 0.060 | -0.081 | 0.079 | 0.001  | 0.001 | -0.011 | 0.022 |
| rs58541850  | 6   | 166165563 | A  | G  | 0.94 | -0.052 | 0.008 | -0.048 | 0.029 | 0.088  | 0.079 | 0.180  | 0.103 | -0.002 | 0.001 | -0.028 | 0.031 |
| rs2529484   | 7   | 111180444 | C  | G  | 0.65 | -0.022 | 0.004 | –      | –     | 0.040  | 0.038 | 0.030  | 0.050 | –      | –     | –      | –     |
| rs13235840  | 7   | 133505091 | T  | A  | 0.82 | -0.031 | 0.005 | –      | –     | -0.047 | 0.047 | -0.095 | 0.062 | –      | –     | –      | –     |
| rs17621391  | 7   | 140176596 | T  | C  | 0.26 | -0.024 | 0.004 | -0.034 | 0.015 | -0.032 | 0.041 | -0.056 | 0.054 | 0.000  | 0.000 | -0.004 | 0.015 |
| rs7821826   | 8   | 10769439  | T  | C  | 0.51 | -0.021 | 0.004 | 0.010  | 0.013 | 0.039  | 0.036 | 0.079  | 0.048 | 0.001  | 0.001 | 0.011  | 0.014 |
| rs12678836  | 8   | 92690148  | A  | C  | 0.58 | -0.023 | 0.004 | -0.003 | 0.013 | 0.010  | 0.037 | 0.012  | 0.048 | 0.000  | 0.001 | 0.023  | 0.013 |
| rs2783992   | 9   | 1722044   | C  | T  | 0.54 | -0.024 | 0.004 | -0.001 | 0.013 | 0.000  | 0.036 | 0.013  | 0.048 | -0.001 | 0.001 | -0.031 | 0.013 |

|            |    |           |   |   |      |        |       |        |       |        |       |        |       |        |       |        |       |
|------------|----|-----------|---|---|------|--------|-------|--------|-------|--------|-------|--------|-------|--------|-------|--------|-------|
| rs34864022 | 9  | 22609110  | G | A | 0.93 | -0.048 | 0.008 | 0.038  | 0.026 | -0.116 | 0.073 | -0.144 | 0.096 | -0.002 | 0.002 | -0.020 | 0.026 |
| rs1999065  | 9  | 120514574 | T | C | 0.66 | -0.025 | 0.004 | 0.009  | 0.014 | 0.026  | 0.038 | 0.080  | 0.051 | 0.000  | 0.000 | -0.008 | 0.014 |
| rs7358158  | 9  | 140251458 | A | G | 0.88 | -0.037 | 0.006 | -0.045 | 0.022 | -      | -     | -      | -     | -      | -     | -      | -     |
| rs68049022 | 10 | 66407019  | T | C | 0.20 | -0.031 | 0.005 | -0.003 | 0.017 | 0.052  | 0.045 | 0.100  | 0.060 | -0.002 | 0.001 | -0.005 | 0.016 |
| rs841020   | 10 | 125409953 | T | C | 0.81 | -0.027 | 0.004 | 0.005  | 0.016 | 0.035  | 0.047 | -0.014 | 0.061 | -0.001 | 0.001 | 0.004  | 0.016 |
| rs4483592  | 11 | 65990439  | T | C | 0.84 | -0.036 | 0.005 | -0.008 | 0.017 | 0.030  | 0.049 | 0.029  | 0.065 | 0.001  | 0.001 | 0.031  | 0.017 |
| rs1391954  | 11 | 88575965  | T | G | 0.56 | -0.025 | 0.004 | 0.059  | 0.015 | -0.282 | 0.036 | -0.180 | 0.048 | 0.000  | 0.000 | 0.035  | 0.013 |
| rs3759344  | 12 | 6862646   | A | G | 0.89 | -0.045 | 0.006 | 0.020  | 0.021 | 0.109  | 0.060 | 0.079  | 0.079 | 0.001  | 0.001 | 0.002  | 0.022 |
| rs10772643 | 12 | 13415288  | C | T | 0.89 | -0.039 | 0.006 | -0.004 | 0.021 | 0.024  | 0.059 | 0.110  | 0.078 | 0.000  | 0.001 | 0.045  | 0.020 |
| rs7969719  | 12 | 109883577 | T | C | 0.69 | -0.027 | 0.004 | 0.035  | 0.014 | -0.007 | 0.039 | -0.013 | 0.051 | 0.001  | 0.001 | 0.037  | 0.014 |
| rs9513416  | 13 | 99055774  | A | G | 0.16 | -0.028 | 0.005 | -0.006 | 0.018 | 0.016  | 0.050 | 0.140  | 0.065 | 0.001  | 0.001 | -0.006 | 0.018 |
| rs10400776 | 14 | 97326366  | C | A | 0.26 | -0.026 | 0.004 | -0.024 | 0.015 | -0.006 | 0.041 | 0.048  | 0.054 | 0.000  | 0.000 | -0.017 | 0.015 |
| rs12324720 | 15 | 64092140  | G | A | 0.18 | -0.027 | 0.005 | 0.041  | 0.017 | 0.037  | 0.048 | 0.131  | 0.063 | -0.001 | 0.001 | 0.028  | 0.016 |
| rs56151256 | 15 | 78024806  | A | C | 0.25 | -0.029 | 0.004 | 0.003  | 0.015 | -0.049 | 0.042 | -0.133 | 0.055 | 0.000  | 0.001 | 0.013  | 0.015 |
| rs11074658 | 16 | 10308335  | C | T | 0.59 | -0.024 | 0.004 | 0.025  | 0.013 | 0.039  | 0.037 | 0.030  | 0.049 | 0.000  | 0.000 | 0.014  | 0.013 |
| rs4889530  | 16 | 31065918  | T | A | 0.38 | -0.025 | 0.004 | -      | -     | -0.075 | 0.037 | -0.023 | 0.049 | -      | -     | -      | -     |
| rs1860337  | 17 | 60851559  | C | T | 0.60 | -0.025 | 0.004 | -0.032 | 0.013 | -0.015 | 0.037 | -0.011 | 0.048 | 0.001  | 0.000 | 0.004  | 0.013 |
| rs73420302 | 17 | 77768068  | G | C | 0.18 | -0.030 | 0.005 | -      | -     | 0.013  | 0.048 | -0.046 | 0.063 | -      | -     | -      | -     |
| rs12962050 | 18 | 35179808  | G | A | 0.65 | -0.023 | 0.004 | -0.001 | 0.013 | 0.038  | 0.038 | 0.031  | 0.050 | 0.001  | 0.001 | 0.002  | 0.014 |
| rs2229383  | 19 | 10794630  | G | T | 0.63 | -0.029 | 0.004 | -0.034 | 0.013 | -0.008 | 0.038 | -0.192 | 0.049 | 0.001  | 0.000 | 0.001  | 0.014 |
| rs6857     | 19 | 45392254  | C | T | 0.17 | -0.037 | 0.005 | -0.024 | 0.018 | -0.097 | 0.049 | -0.081 | 0.064 | -0.001 | 0.001 | -0.066 | 0.018 |
| rs6010651  | 20 | 62418243  | A | C | 0.38 | -0.024 | 0.004 | 0.001  | 0.013 | 0.064  | 0.038 | 0.036  | 0.049 | -0.001 | 0.001 | -0.001 | 0.014 |

| SNP        | Chr | BP        | RA | EA | EAF  | MVPA  |       | IOP    |       | mRNFL  |       | mGCIPL |       | vCDR  |       | POAG   |       |
|------------|-----|-----------|----|----|------|-------|-------|--------|-------|--------|-------|--------|-------|-------|-------|--------|-------|
|            |     |           |    |    |      | Beta  | SE    | Beta   | SE    | Beta   | SE    | Beta   | SE    | Beta  | SE    | Beta   | SE    |
| rs1160545  | 2   | 100832269 | C  | T  | 0.40 | 0.025 | 0.004 | -0.020 | 0.013 | 0.026  | 0.037 | 0.111  | 0.048 | 0.000 | 0.000 | -0.026 | 0.013 |
| rs7613360  | 3   | 49916710  | T  | C  | 0.60 | 0.025 | 0.004 | -0.005 | 0.013 | -0.021 | 0.037 | -0.099 | 0.049 | 0.002 | 0.001 | 0.008  | 0.014 |
| rs1691471  | 3   | 85011013  | C  | T  | 0.38 | 0.038 | 0.004 | -0.046 | 0.013 | -0.018 | 0.037 | -0.025 | 0.049 | 0.038 | 0.001 | -0.051 | 0.014 |
| rs13201721 | 6   | 141799534 | C  | T  | 0.74 | 0.026 | 0.004 | -0.026 | 0.015 | 0.003  | 0.041 | 0.140  | 0.054 | 0.026 | 0.001 | 0.035  | 0.015 |
| rs1625595  | 11  | 66078129  | T  | C  | 0.53 | 0.021 | 0.003 | 0.021  | 0.013 | -0.012 | 0.036 | -0.006 | 0.047 | 0.021 | 0.001 | 0.029  | 0.013 |
| rs385301   | 17  | 19806828  | T  | C  | 0.74 | 0.028 | 0.005 | 0.028  | 0.016 | 0.050  | 0.041 | -0.012 | 0.054 | 0.028 | 0.001 | -0.050 | 0.015 |

**Abbreviations:** BP, base position (build 37); Chr, chromosome; EA, effect allele; EAF, effect allele frequency; IOP, intraocular pressure; LST, leisure screen time; mGCIPL, macular ganglion cell-inner plexiform layer; mRNFL, macular retinal nerve fiber layer; MVPA, moderate-to-vigorous physical activity; POAG, primary open-angle glaucoma; RA, reference allele; SE, standard error; SNP, single-nucleotide polymorphism; vCDR, vertical cup-disc ratio.

**Supplementary Table 2.** Results of Mendelian randomization analyses

|                 | IOP (mmHg)           |         | mRNFL ( $\mu\text{m}$ ) |         | mGCIPL ( $\mu\text{m}$ ) |         | vCDR                |         | POAG (%)            |         |
|-----------------|----------------------|---------|-------------------------|---------|--------------------------|---------|---------------------|---------|---------------------|---------|
|                 | Beta (95% CI)        | P-value | Beta (95% CI)           | P-value | Beta (95% CI)            | P-value | Beta (95% CI)       | P-value | Odds ratio (95% CI) | P-value |
| <b>LST</b>      |                      |         |                         |         |                          |         |                     |         |                     |         |
| IVW             | -0.15 (-0.39, 0.09)  | 0.22    | 0.00 (-0.57, 0.57)      | 0.99    | 0.06 (-0.60, 0.72)       | 0.86    | -0.01 (-0.01, 0.00) | 0.12    | 0.92 (0.75, 1.13)   | 0.44    |
| Weighted median | -0.01 (-0.25, 0.24)  | 0.97    | -0.07 (-0.64, 0.51)     | 0.82    | -0.42 (-1.18, 0.34)      | 0.28    | 0.00 (-0.01, 0.01)  | 0.61    | 0.87 (0.69, 1.10)   | 0.24    |
| MR-Egger        | 0.34 (-0.81, 1.49)   | 0.56    | 0.48 (-2.38, 3.34)      | 0.74    | 1.56 (-1.73, 4.85)       | 0.35    | 0.00 (-0.04, 0.04)  | 0.91    | 1.02 (0.37, 2.85)   | 0.97    |
| MR-PRESSO       | -0.05 (-0.26, 0.16)  | 0.66    | -0.20 (-0.61, 0.21)     | 0.34    | -0.23 (-0.80, 0.33)      | 0.42    | 0.00 (-0.01, 0.00)  | 0.16    | 0.88 (0.72, 1.07)   | 0.20    |
| <b>MVPA</b>     |                      |         |                         |         |                          |         |                     |         |                     |         |
| IVW             | -0.62 (-1.11, -0.12) | 0.014   | 0.10 (-1.01, 1.20)      | 0.86    | 0.45 (-2.15, 3.06)       | 0.73    | 0.01 (-0.03, 0.04)  | 0.66    | 0.60 (0.21, 1.71)   | 0.34    |
| Weighted median | -0.82 (-1.37, -0.26) | 0.004   | -0.25 (-1.63, 1.13)     | 0.72    | -0.47 (-2.50, 1.56)      | 0.65    | 0.00 (-0.02, 0.01)  | 0.72    | 0.33 (0.18, 0.62)   | 0.001   |
| MR-Egger        | -3.07 (-5.11, -1.03) | 0.003   | -0.45 (-6.12, 5.22)     | 0.88    | -2.61 (-17.21, 11.99)    | 0.73    | -0.13 (-0.32, 0.06) | 0.19    | 0.01 (0.00, 0.60)   | 0.028   |
| MR-PRESSO       | –                    | –       | –                       | –       | -0.25 (-2.66, 2.16)      | 0.85    | 0.03 (-0.02, 0.08)  | 0.50    | 0.68 (0.18, 2.54)   | 0.67    |

**Abbreviations:** IOP, intraocular pressure; LST, leisure screen time; mGCIPL, macular ganglion cell-inner plexiform layer; MR-Egger, Mendelian Randomization-Egger; mRNFL, macular retinal nerve fiber layer; MR-PRESSO, Mendelian Randomization-Pleiotropy Residual Sum and Outlier; MVPA, moderate-to-vigorous physical activity; POAG, primary open-angle glaucoma; vCDR, vertical cup-disc ratio.

**Supplementary Table 3.** Tests of heterogeneity, directional pleiotropy and regression dilution statistics for the physical activity instrumental variables

|                                               | <b>IOP</b> |                 | <b>mRNFL</b> |                 | <b>mGCIPL</b> |                 | <b>vCDR</b> |                 | <b>POAG</b> |                 |
|-----------------------------------------------|------------|-----------------|--------------|-----------------|---------------|-----------------|-------------|-----------------|-------------|-----------------|
|                                               | Estimate   | <i>P</i> -value | Estimate     | <i>P</i> -value | Estimate      | <i>P</i> -value | Estimate    | <i>P</i> -value | Estimate    | <i>P</i> -value |
| <b>Leisure screen time</b>                    |            |                 |              |                 |               |                 |             |                 |             |                 |
| <b>IVW</b>                                    |            |                 |              |                 |               |                 |             |                 |             |                 |
| Cochran's <i>Q</i> statistic                  | 128.2 (50) | <0.001          | 123.0 (57)   | <0.001          | 95.6 (57)     | 0.001           | 102.9 (50)  | <0.001          | 97.3 (50)   | <0.001          |
| <i>I</i> <sup>2</sup> statistic               | 61.0%      | –               | 53.7%        | –               | 40.4%         | –               | 51.4%       | –               | 48.6%       | –               |
| <b>MR-Egger</b>                               |            |                 |              |                 |               |                 |             |                 |             |                 |
| Rucker's <i>Q</i> ' statistic                 | 126.3 (49) | <0.001          | 122.8 (56)   | <0.001          | 94.2 (56)     | 0.001           | 102.7 (49)  | <0.001          | 97.3 (49)   | <0.001          |
| <i>I</i> <sup>2</sup> <sub>GX</sub> statistic | 0.0%       | –               | 0.0%         | –               | 0.0%          | –               | 81.1%       | –               | 0.0%        | –               |
| Intercept                                     | -0.01      | 0.39            | -0.01        | 0.74            | -0.04         | 0.36            | 0.00        | 0.72            | 0.00        | 0.84            |
| <b>MR-PRESSO</b>                              |            |                 |              |                 |               |                 |             |                 |             |                 |
| Global test                                   | –          | <0.001          | –            | <0.001          | –             | <0.001          | –           | <0.001          | –           | <0.001          |
| Number of outliers                            | 2          | –               | 1            | –               | 2             | –               | 1           | –               | 1           | –               |
| Distortion test                               | -213.7     | 0.15            | 101.7%       | 0.33            | 124.9%        | 0.30            | -31.0%      | 0.58            | 37.1%       | 0.72            |
| <b>Moderate-to-vigorous physical activity</b> |            |                 |              |                 |               |                 |             |                 |             |                 |
| <b>IVW</b>                                    |            |                 |              |                 |               |                 |             |                 |             |                 |
| Cochran's <i>Q</i> statistic                  | 7.5 (5)    | 0.18            | 2.6 (5)      | 0.76            | 16.1 (5)      | 0.007           | 38.8 (5)    | <0.001          | 34.5 (5)    | <0.001          |
| <i>I</i> <sup>2</sup> statistic               | 33.6%      | –               | 0.0%         | –               | 68.9%         | –               | 87.1%       | –               | 85.5%       | –               |
| <b>MR-Egger</b>                               |            |                 |              |                 |               |                 |             |                 |             |                 |
| Rucker's <i>Q</i> ' statistic                 | 1.7 (4)    | 0.78            | 2.6 (4)      | 0.63            | 15.4 (4)      | 0.004           | 26.1 (4)    | <0.001          | 17.3 (4)    | 0.002           |
| <i>I</i> <sup>2</sup> <sub>GX</sub> statistic | 53.0%      | –               | 50.9%        | –               | 50.8%         | –               | 84.8%       | –               | 51.5%       | –               |
| Intercept                                     | 0.07       | 0.016           | 0.02         | 0.85            | 0.09          | 0.68            | 0.00        | 0.16            | 0.12        | 0.046           |
| <b>MR-PRESSO</b>                              |            |                 |              |                 |               |                 |             |                 |             |                 |
| Global test                                   | –          | 0.21            | –            | 0.76            | –             | 0.018           | –           | 0.001           | –           | <0.001          |
| Number of outliers                            | 0          | –               | 0            | –               | 1             | –               | 4           | –               | 4           | –               |
| Distortion test                               | –          | –               | –            | –               | 280.4%        | 0.16            | -72.1%      | <0.001          | -30.8%      | >0.99           |

**Abbreviations:** CI, confidence interval; IOP, intraocular pressure; IVW, inverse variance weighted; mGCIPL, macular ganglion cell-inner plexiform layer; MR-PRESSO, Mendelian Randomization-Pleiotropy Residual Sum and Outlier; MR-Egger, Mendelian Randomization-Egger; mRNFL, macular retinal nerve fiber layer; POAG, primary open-angle glaucoma; vCDR, vertical cup-disc ratio.

**Supplementary Figure 1.** Scatter plot of the SNP-LST (exposure) and SNP-IOP (outcome) association estimates for the leisure screen time instrumental variable

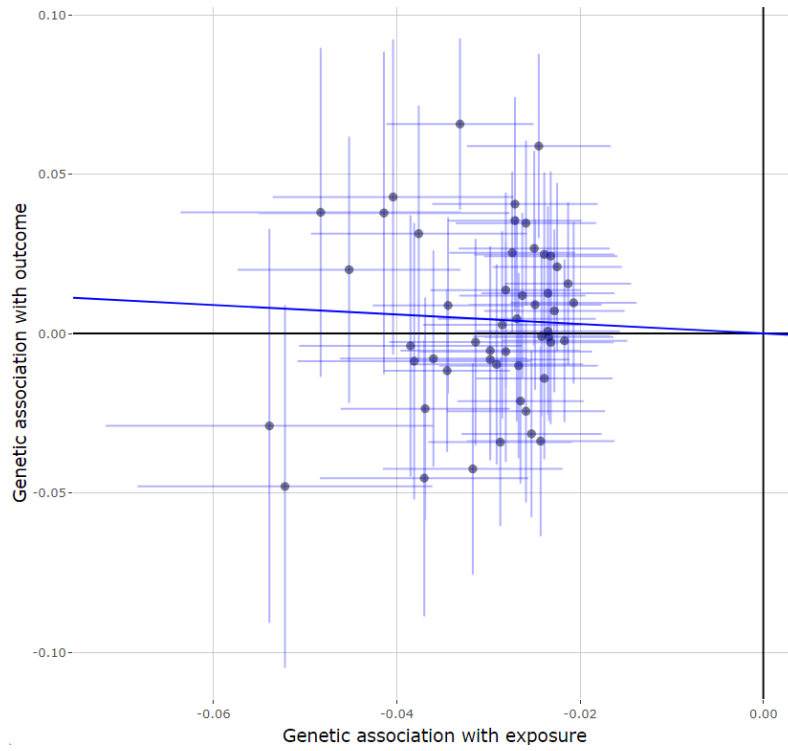

**Supplementary Figure 2.** Scatter plot of the SNP-LST (exposure) and SNP-mRNFL (outcome) association estimates for the leisure screen time instrumental variable

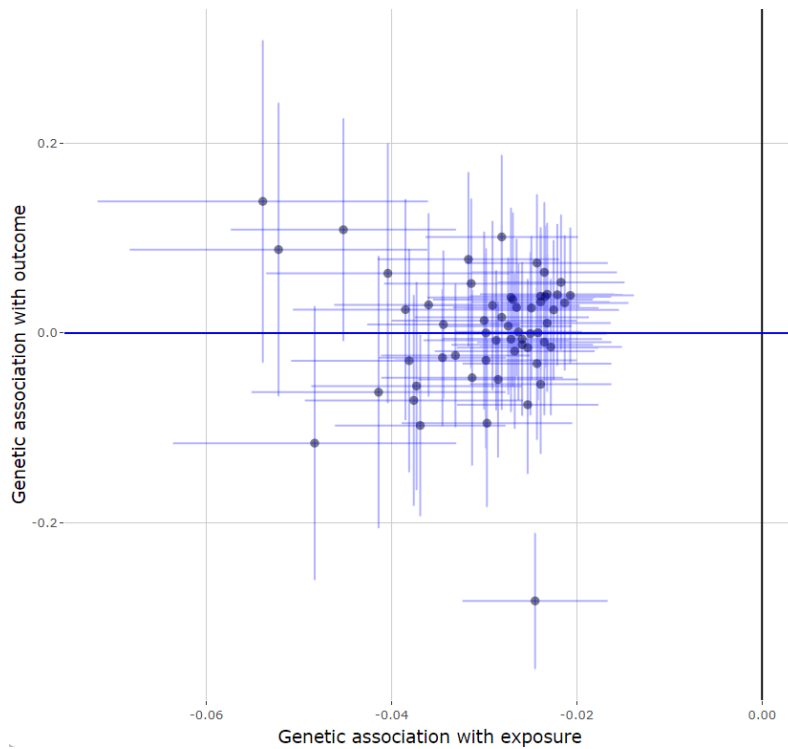



**Supplementary Figure 3.** Scatter plot of the SNP-LST (exposure) and SNP-mGCIPL (outcome) association estimates for the leisure screen time instrumental variable

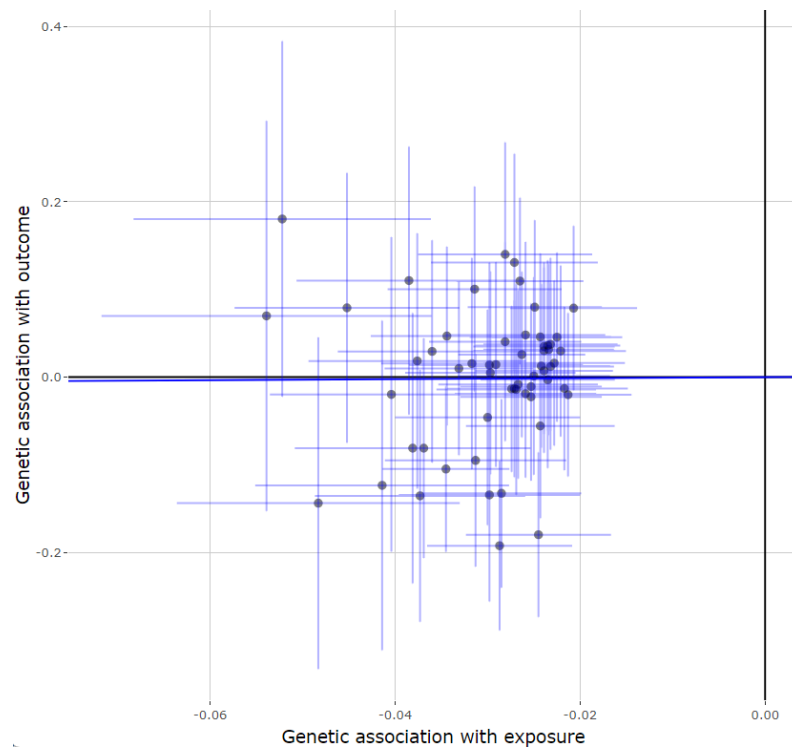

**Supplementary Figure 4.** Scatter plot of the SNP-LST (exposure) and SNP-vCDR (outcome) association estimates for the leisure screen time instrumental variable

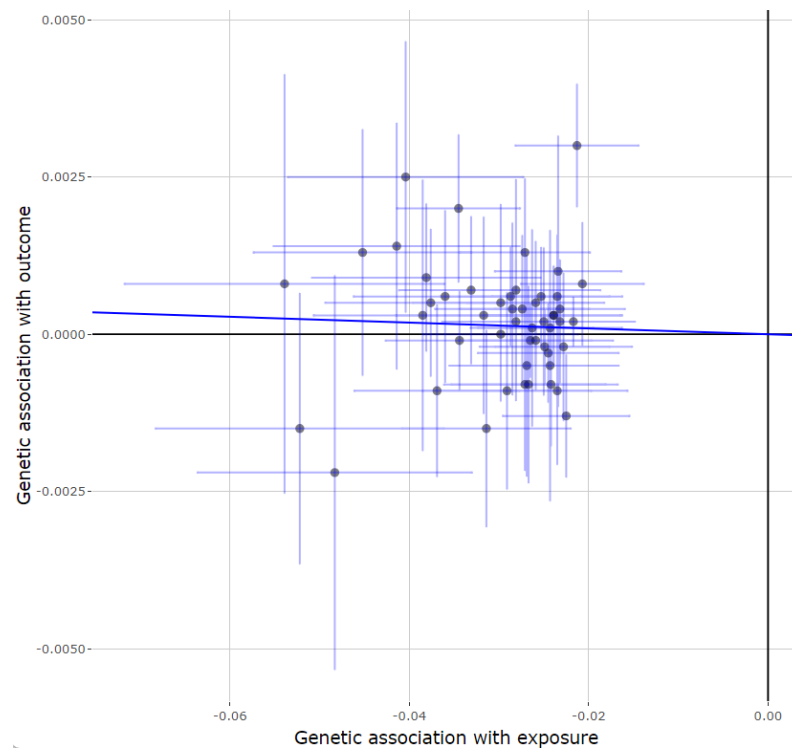

**Supplementary Figure 5.** Scatter plot of the SNP-LST (exposure) and SNP-POAG (outcome) association estimates for the leisure screen time instrumental variable

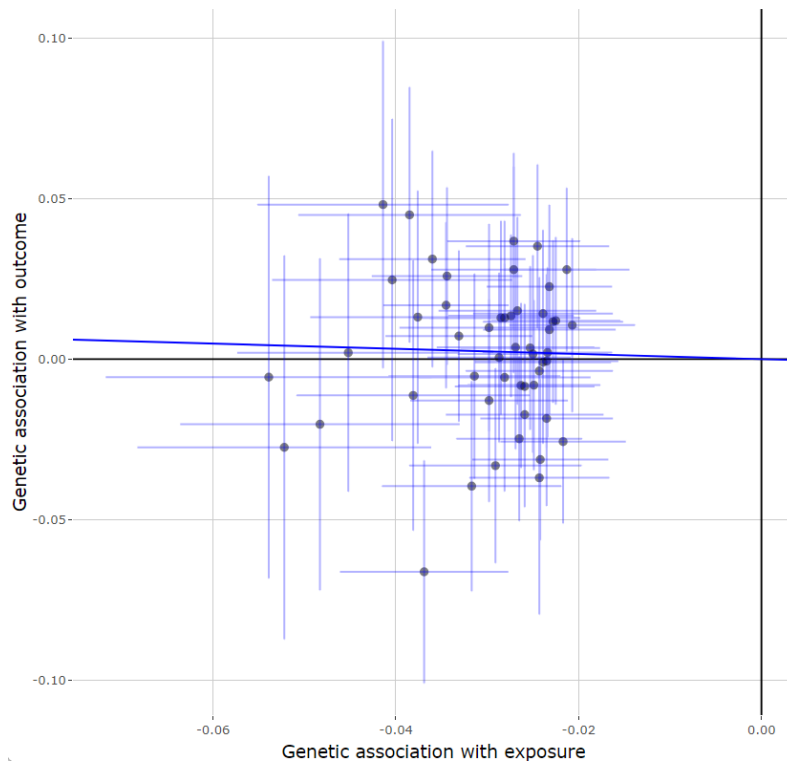

**Supplementary Figure 6.** Scatter plot of the SNP-MVPA (exposure) and SNP-IOP (outcome) association estimates for the moderate-to-vigorous physical activity instrumental variable

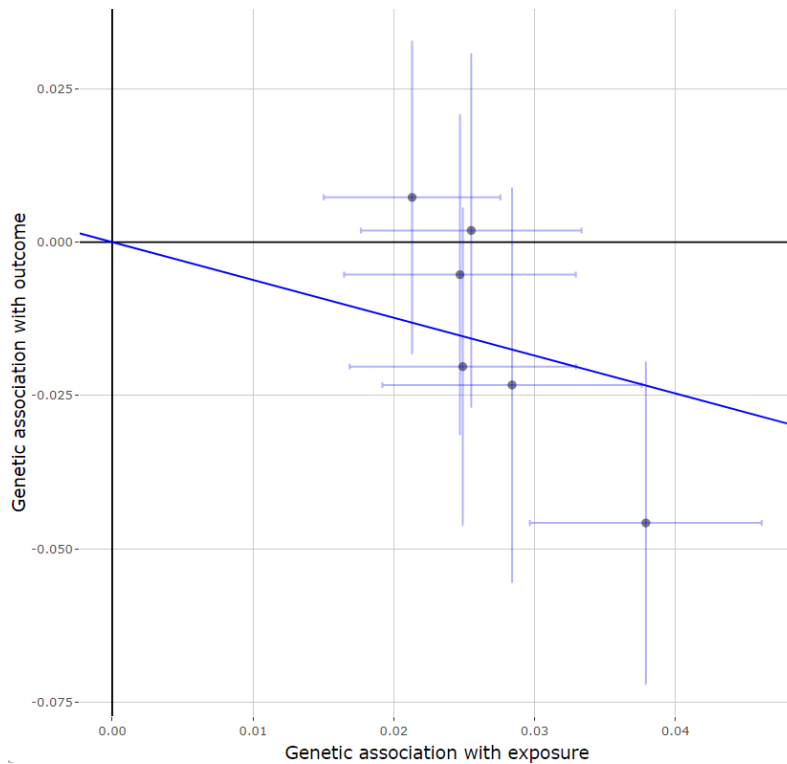

**Supplementary Figure 7.** Scatter plot of the SNP-MVPA (exposure) and SNP-mRNFL (outcome) association estimates for the moderate-to-vigorous physical activity instrumental variable

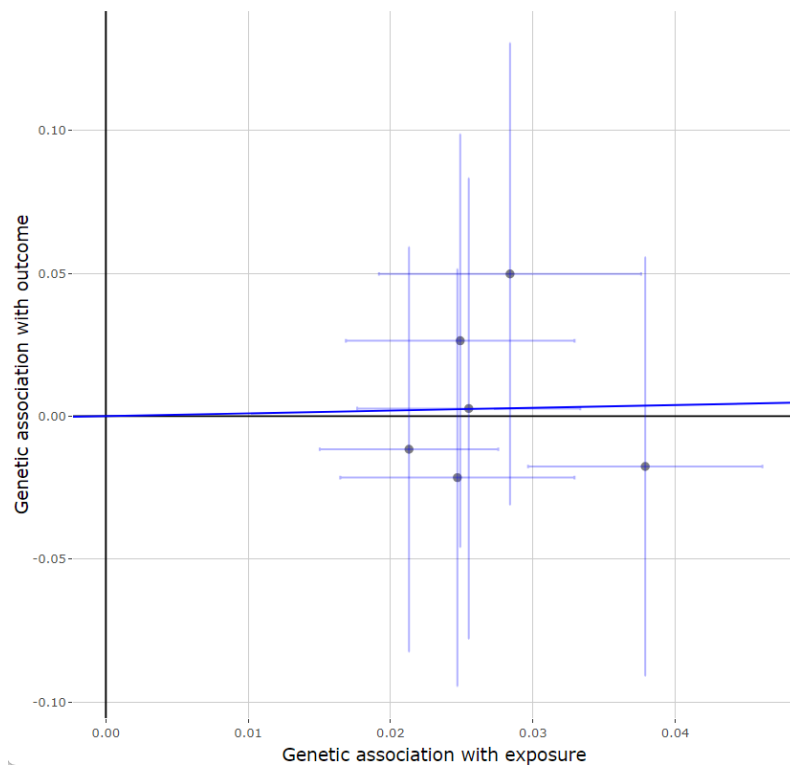

**Supplementary Figure 8.** Scatter plot of the SNP-MVPA (exposure) and SNP-mGCIPL (outcome) association estimates for the moderate-to-vigorous physical activity instrumental variable

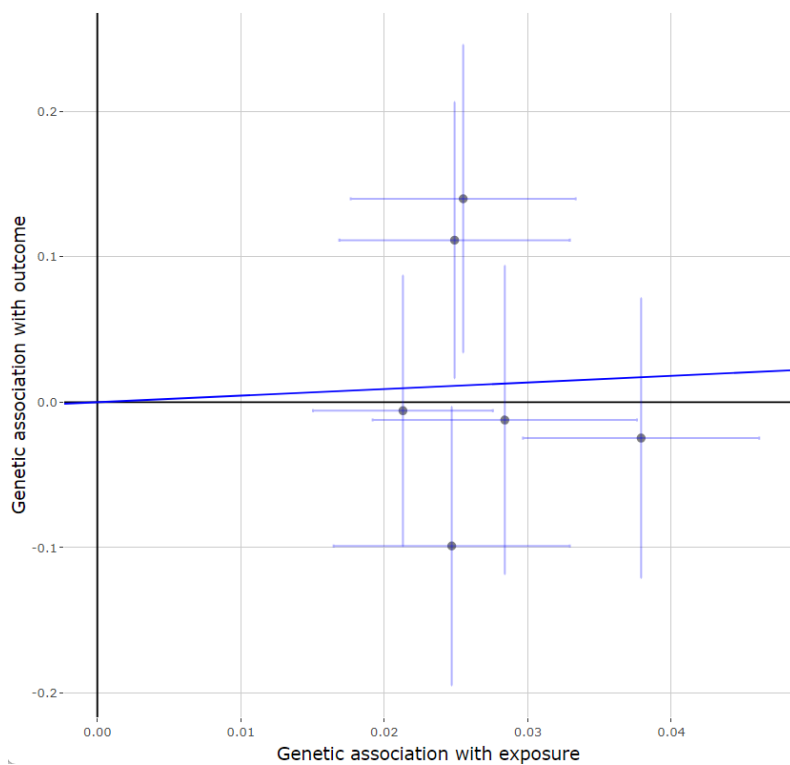

**Supplementary Figure 9.** Scatter plot of the SNP-MVPA (exposure) and SNP-vCDR (outcome) association estimates for the moderate-to-vigorous physical activity instrumental variable

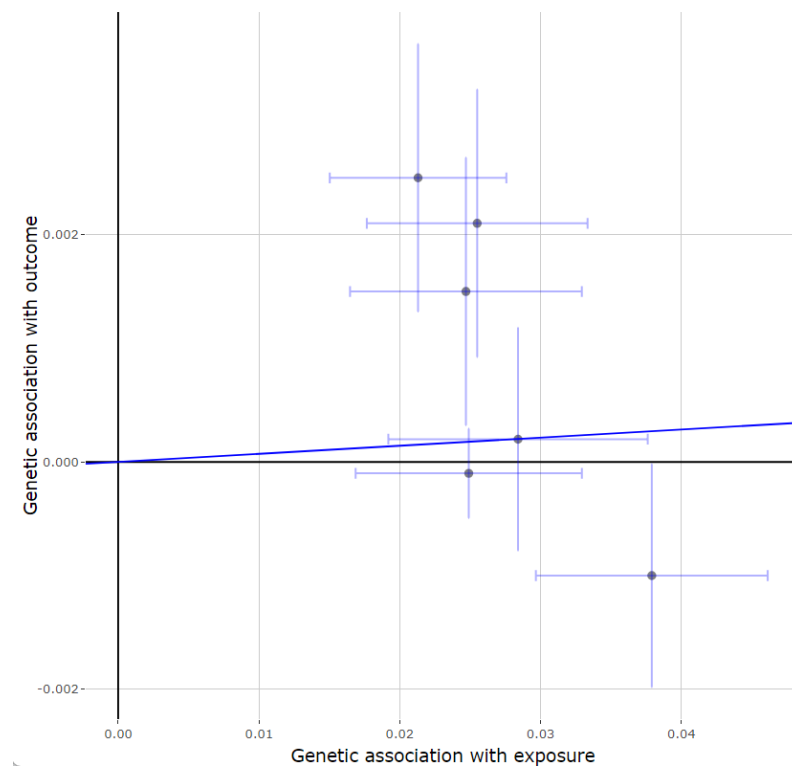

**Supplementary Figure 10.** Scatter plot of the SNP-MVPA (exposure) and SNP-POAG (outcome) association estimates for the moderate-to-vigorous physical activity instrumental variable

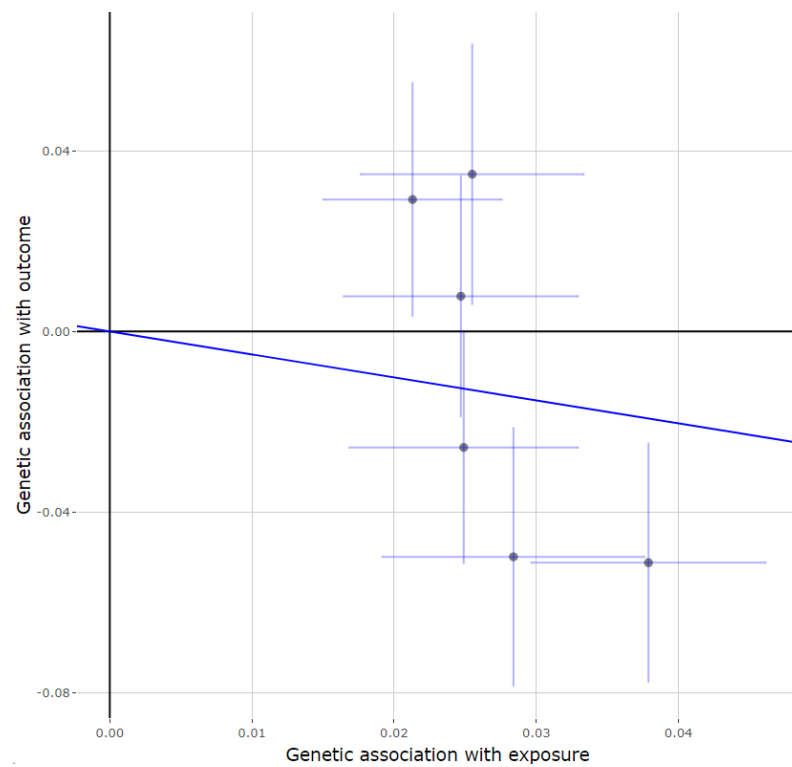

Supplement: NIHMS1965544-supplement-Supplement_7.pdf [file NIHMS1965544-supplement-Supplement_7.pdf]
