# Supplementary material for: The Association of Physical Activity with Glaucoma and Related Traits in the UK Biobank
Source: PubMed Central journal article supplement (PMC10913205; doi:10.1016/j.ophtha.2023.06.009), 2023-06-17
Supplement: NIHMS1965544-supplement-Supplement_3.pdf [file NIHMS1965544-supplement-Supplement_3.pdf]

**Supplementary Table 6** - Association of accelerometer-derived physical activity with intraocular pressure, macular retinal nerve fiber layer thickness and macular ganglion cell inner plexiform layer thickness, additionally adjusted for caffeine use

|                                              |        |                    |                  |
|----------------------------------------------|--------|--------------------|------------------|
| <b><i>Difference in IOP (mmHg)</i></b>       |        |                    |                  |
| Sedentary                                    | <0.001 | (-0.00002, 0.0001) | 0.25             |
| Low                                          | -0.003 | (-0.006, -0.0001)  | <b>0.039</b>     |
| Moderate                                     | 0.002  | (-0.002, 0.006)    | 0.39             |
| Vigorous                                     | 0.007  | (-0.026, 0.039)    | 0.69             |
| <b><i>Difference in mRNFL thickness</i></b>  |        |                    |                  |
| Sedentary                                    | 0.001  | (-0.002, 0.004)    | 0.41             |
| Low                                          | -0.002 | (-0.008, 0.003)    | 0.44             |
| Moderate                                     | 0.007  | (-0.001, 0.015)    | 0.09             |
| Vigorous                                     | 0.01   | (-0.05, 0.07)      | 0.76             |
| <b><i>Difference in mGCIPL thickness</i></b> |        |                    |                  |
| Sedentary                                    | -0.001 | (-0.004, 0.004)    | 0.77             |
| Low                                          | 0.005  | (-0.002, 0.013)    | 0.16             |
| Moderate                                     | 0.02   | (0.01, 0.03)       | <b>&lt;0.001</b> |
| Vigorous                                     | 0.10   | (0.02, 0.18)       | <b>0.012</b>     |

**Abbreviations:** IOP, intraocular pressure; mRNFL, macular retinal nerve fiber layer; mGCIPL, macular ganglion cell inner plexiform layer. Beta coefficients reported from multivariable-adjusted models adjusting for age, sex, ethnicity, Townsend deprivation index, body mass index, systolic blood pressure, smoking status, alcohol status, diabetes status, spherical equivalent, height, caffeine intake and season.
